# Supplementary material for: Hidden impacts of conservation management on fertility of the critically endangered kākāpō
Source: PeerJ journal article supplement (doi:10.7717/peerj.14675), 2023-02-03

Mother age (years)

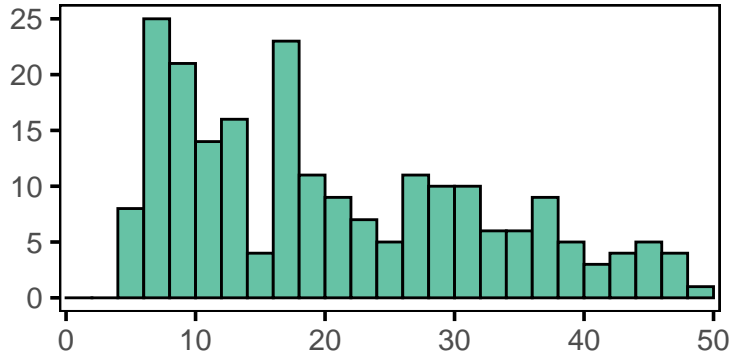

Father age (years)

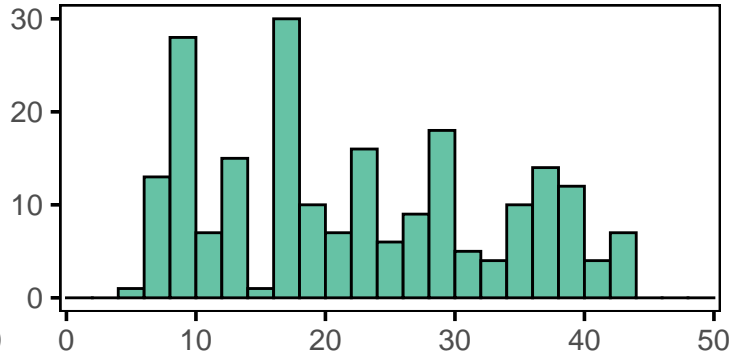

Father previous copulations

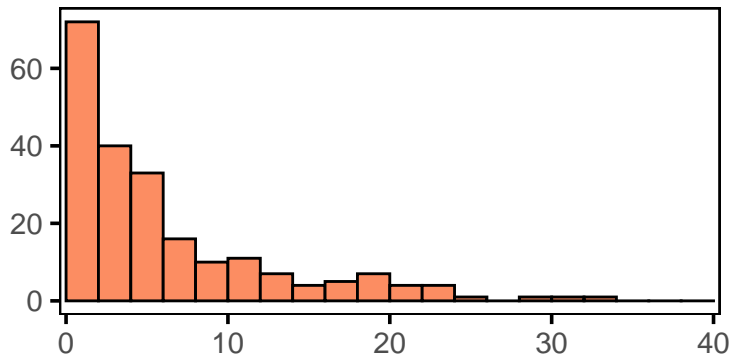

Mother previous copulations

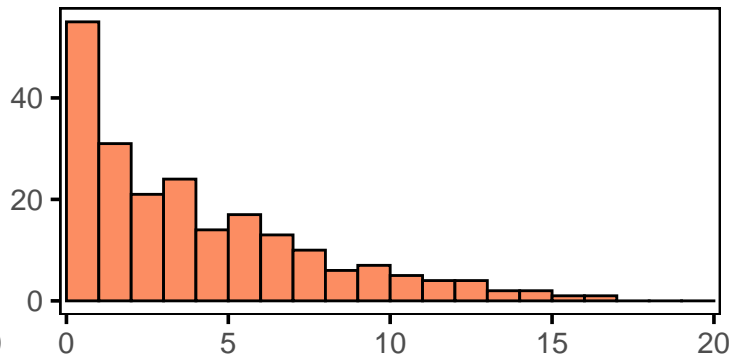

Mother/father kinship

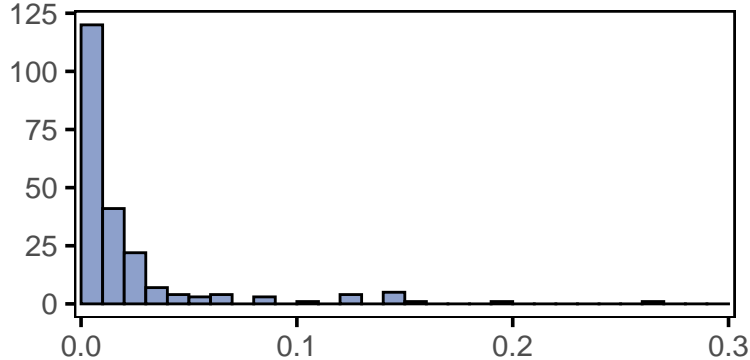

Supplement: figure_s2_predictor_distributions.pdf [file figure_s2_predictor_distributions.pdf]
